# Supplementary material for: The DEK oncogene activates VEGF expression and promotes tumor angiogenesis and growth in HIF-1α-dependent and -independent manners
Source: PubMed Central journal article supplement (PMC5029660; doi:10.18632/oncotarget.8060), 2016-03-14
Supplement: oncotarget-07-23740-s001.pdf [file oncotarget-07-23740-s001.pdf]

## The DEK oncogene activates VEGF expression and promotes tumor angiogenesis and growth in HIF-1 $\alpha$ -dependent and -independent manners

### SUPPLEMENTARY FIGURES AND TABLES

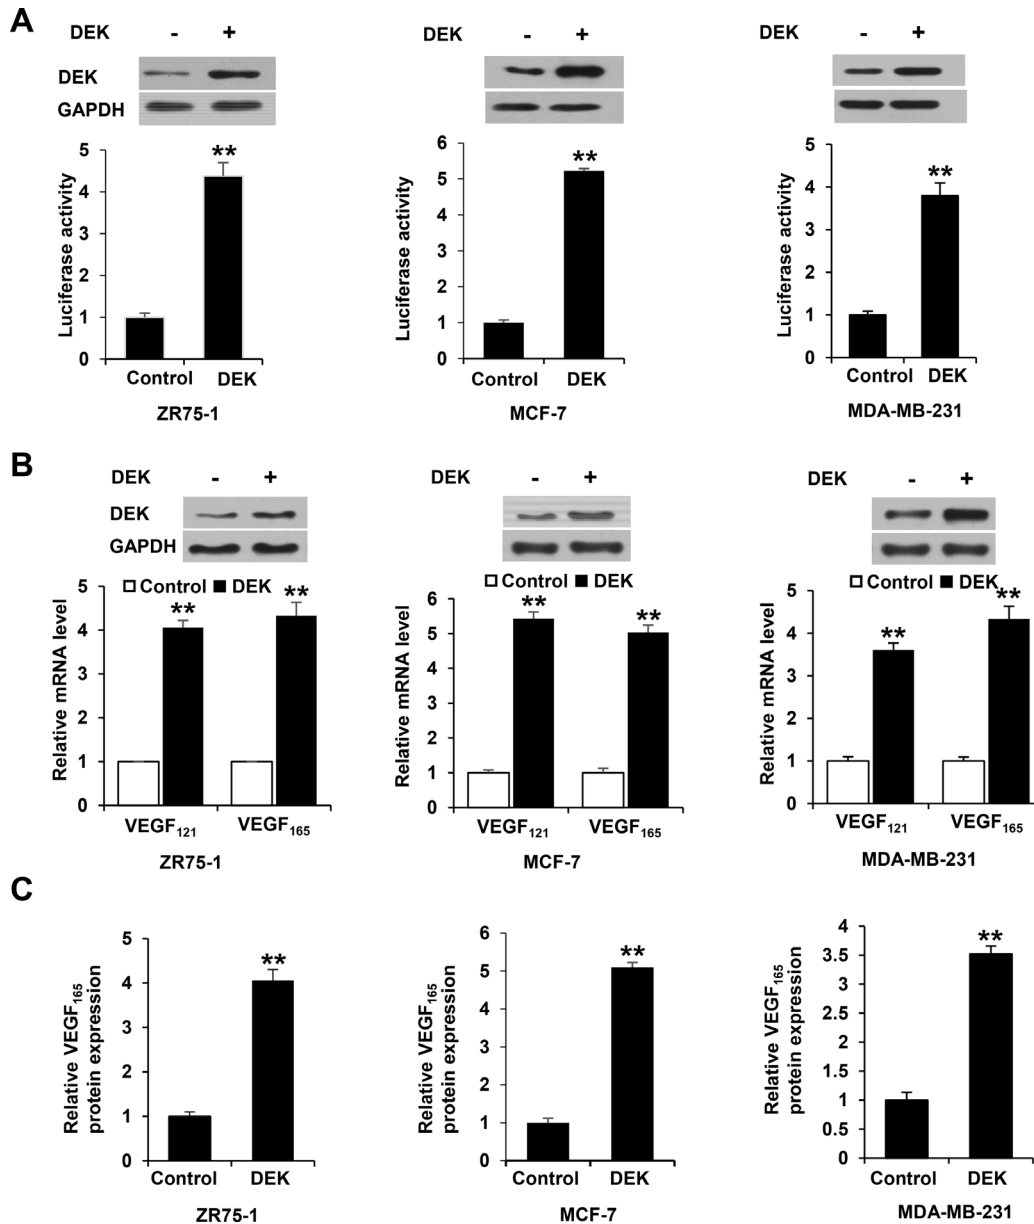

**Supplementary Figure S1: DEK increases VEGF expression in breast cancer cells.** **A.** Luciferase reporter assays in ZR75-1, MCF-7 and MDA-MB-231 breast cancer cells cotransfected with VEGF-Luc and DEK or empty vector (control). Representative immunoblot shows DEK expression. GAPDH was used as a loading control. **B.** Real-time RT-PCR analyses of the expression of VEGF<sub>121</sub> and VEGF<sub>165</sub>, two major VEGF isoforms, in ZR75-1, MCF-7 and MDA-MB-231 cells stably infected with lentivirus carrying DEK or empty vector (control). Representative immunoblot indicates the expression of DEK. **C.** ELISA analyses of the VEGF concentration in cell supernatants from ZR75-1, MCF-7 and MDA-MB-231 cells stably infected as in B. Data shown are mean  $\pm$  SD of triplicate measurements that have been repeated 3 times with similar results (A-C).  $**P < 0.01$  versus empty vector (control).

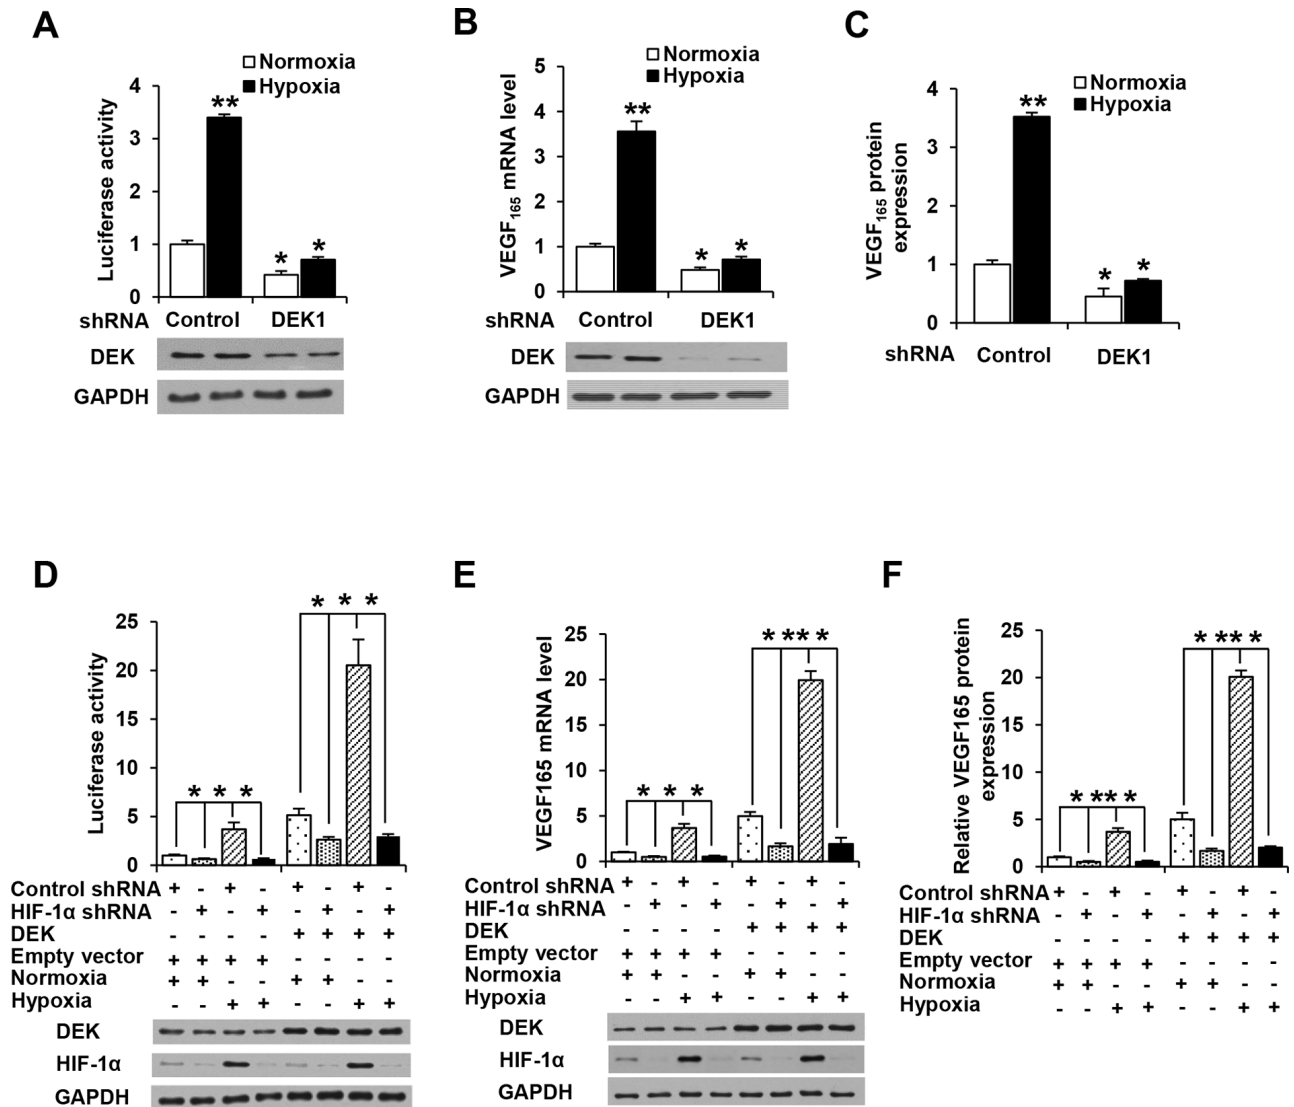

**Supplementary Figure S2: DEK regulates VEGF expression in HIF-1α-dependent and -independent manners.** **A.** Luciferase reporter assays in MDA-MB-231 breast cancer cells cotransfected with VEGF-Luc and DEK shRNA1 or control shRNA. Twenty four hours after transfection, cells were exposed to either normoxic (20% O<sub>2</sub>) or hypoxic (1% O<sub>2</sub>) conditions for another 24 h. Representative immunoblot indicates the expression of DEK. **B.** Real-time RT-PCR analysis of VEGF<sub>165</sub> expression in MDA-MB-231 cells stably infected with lentivirus carrying DEK shRNA1 or control shRNA. Cells were exposed to either normoxic or hypoxic conditions for 24 h before collected. Representative immunoblot shows the expression of DEK. **C.** ELISA analyses of the VEGF protein level in cell supernatants from MDA-MB-231 cells stably infected and treated as in B. **D.** Luciferase reporter assays in MDA-MB-231 cells cotransfected with VEGF-Luc, DEK and HIF-1α shRNA as indicated. Cells were treated and analyzed as in A. **E.** Real-time RT-PCR analyses of VEGF<sub>165</sub> expression in MDA-MB-231 cells stably infected with lentivirus carrying DEK and HIF-1α shRNA as indicated. Cells were treated and analyzed as in B. **F.** ELISA analyses of the VEGF protein level in cell supernatants from MDA-MB-231 cells stably infected and treated as in E. All values shown are mean ± SD of triplicate measurements and have been repeated 3 times with similar results (C, D). \**P* < 0.05, \*\**P* < 0.01 versus control shRNA or control shRNA plus empty vector.

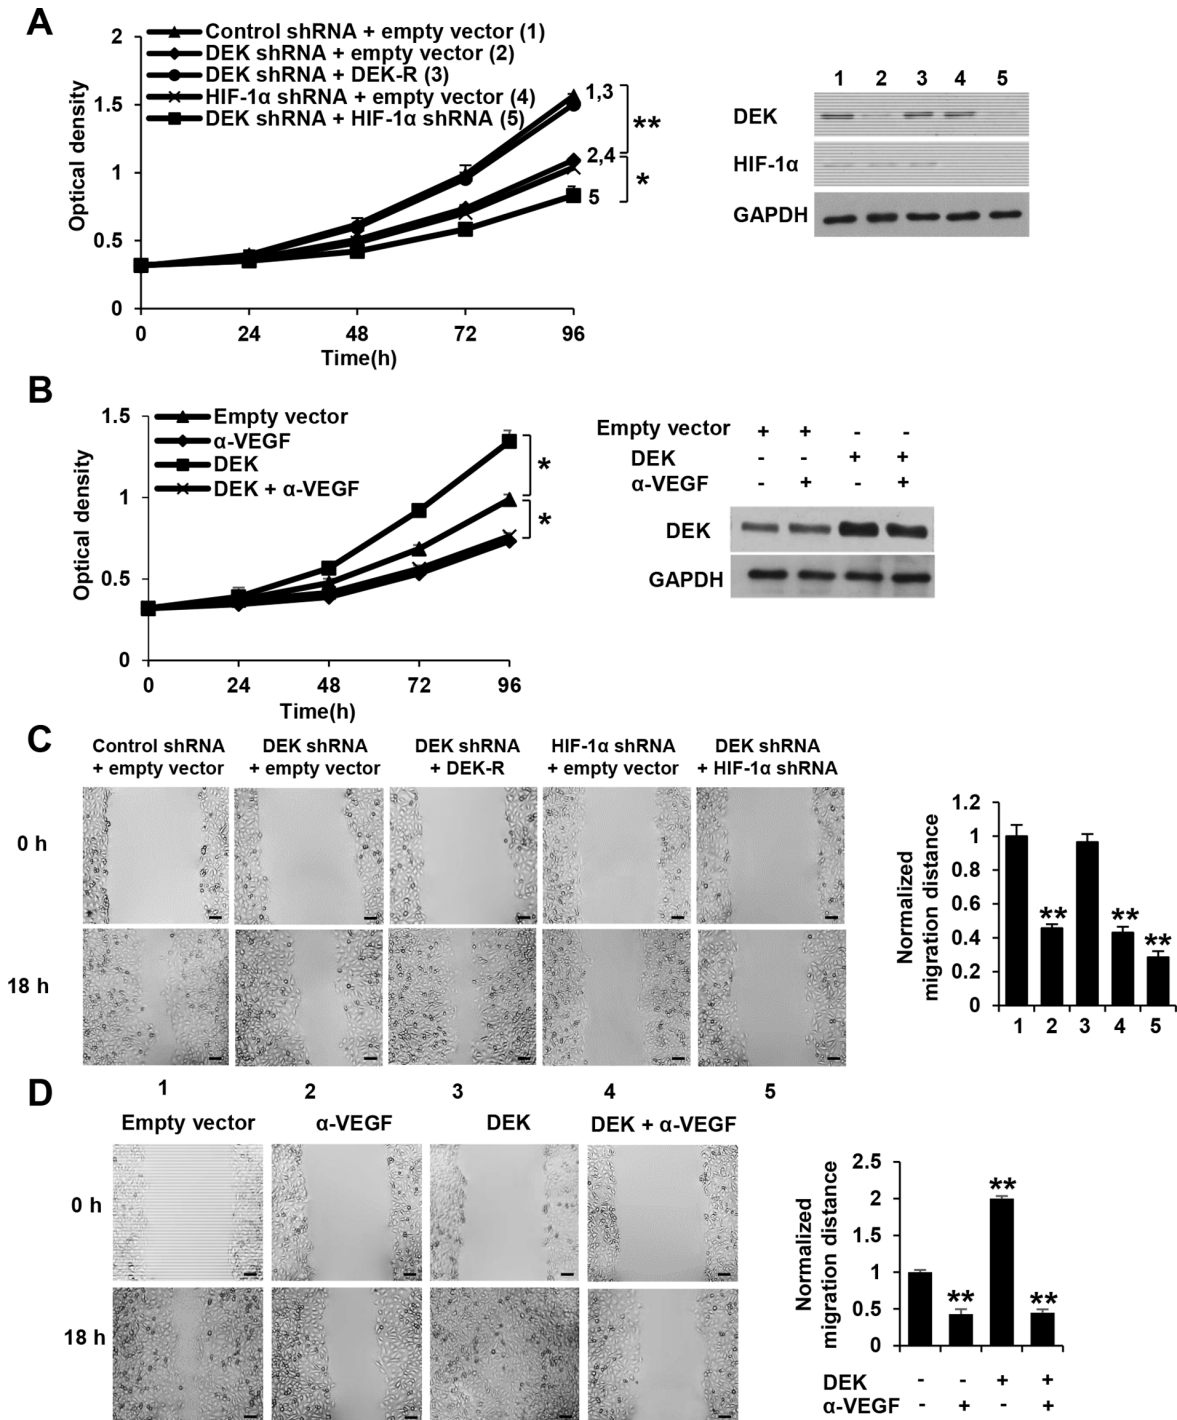

**Supplementary Figure S3: Cancer cell-secreted VEGF regulated by DEK controls HUVEC proliferation and migration.** **A.** Cell proliferation assays in HUVEC cells grown in conditioned medium from MDA-MB-231 cells stably infected with lentivirus harboring DEK shRNA, DEK shRNA plus DEK-resistant shRNA (DEK-R), HIF-1α shRNA or DEK shRNA plus HIF-1α shRNA under hypoxic conditions. Representative immunoblot indicates the expression of DEK and HIF-1α. **B.** Cell proliferation assays in HUVEC cells grown in conditioned medium from MDA-MB-231 cells stably transfected with DEK under hypoxic conditions and treated with a VEGF neutralizing antibody (α-VEGF). Representative immunoblot shows DEK expression. \**P* < 0.05, \*\**P* < 0.01 (A, B). **C.** Wound healing assays for HUVEC cells grown in conditioned medium from MDA-MB-231 cells stably infected as in A. **D.** Wound healing assays for HUVEC cells grown in conditioned medium from MDA-MB-231 cells stably transfected and treated as in B. The image displayed is one of the representative results (C, D). Scale bar: 100 μm. All values shown are mean ± SD of triplicate measurements and have been repeated 3 times with similar results (C, D). \**P* < 0.05, \*\**P* < 0.01 versus empty vector or control shRNA plus empty vector.

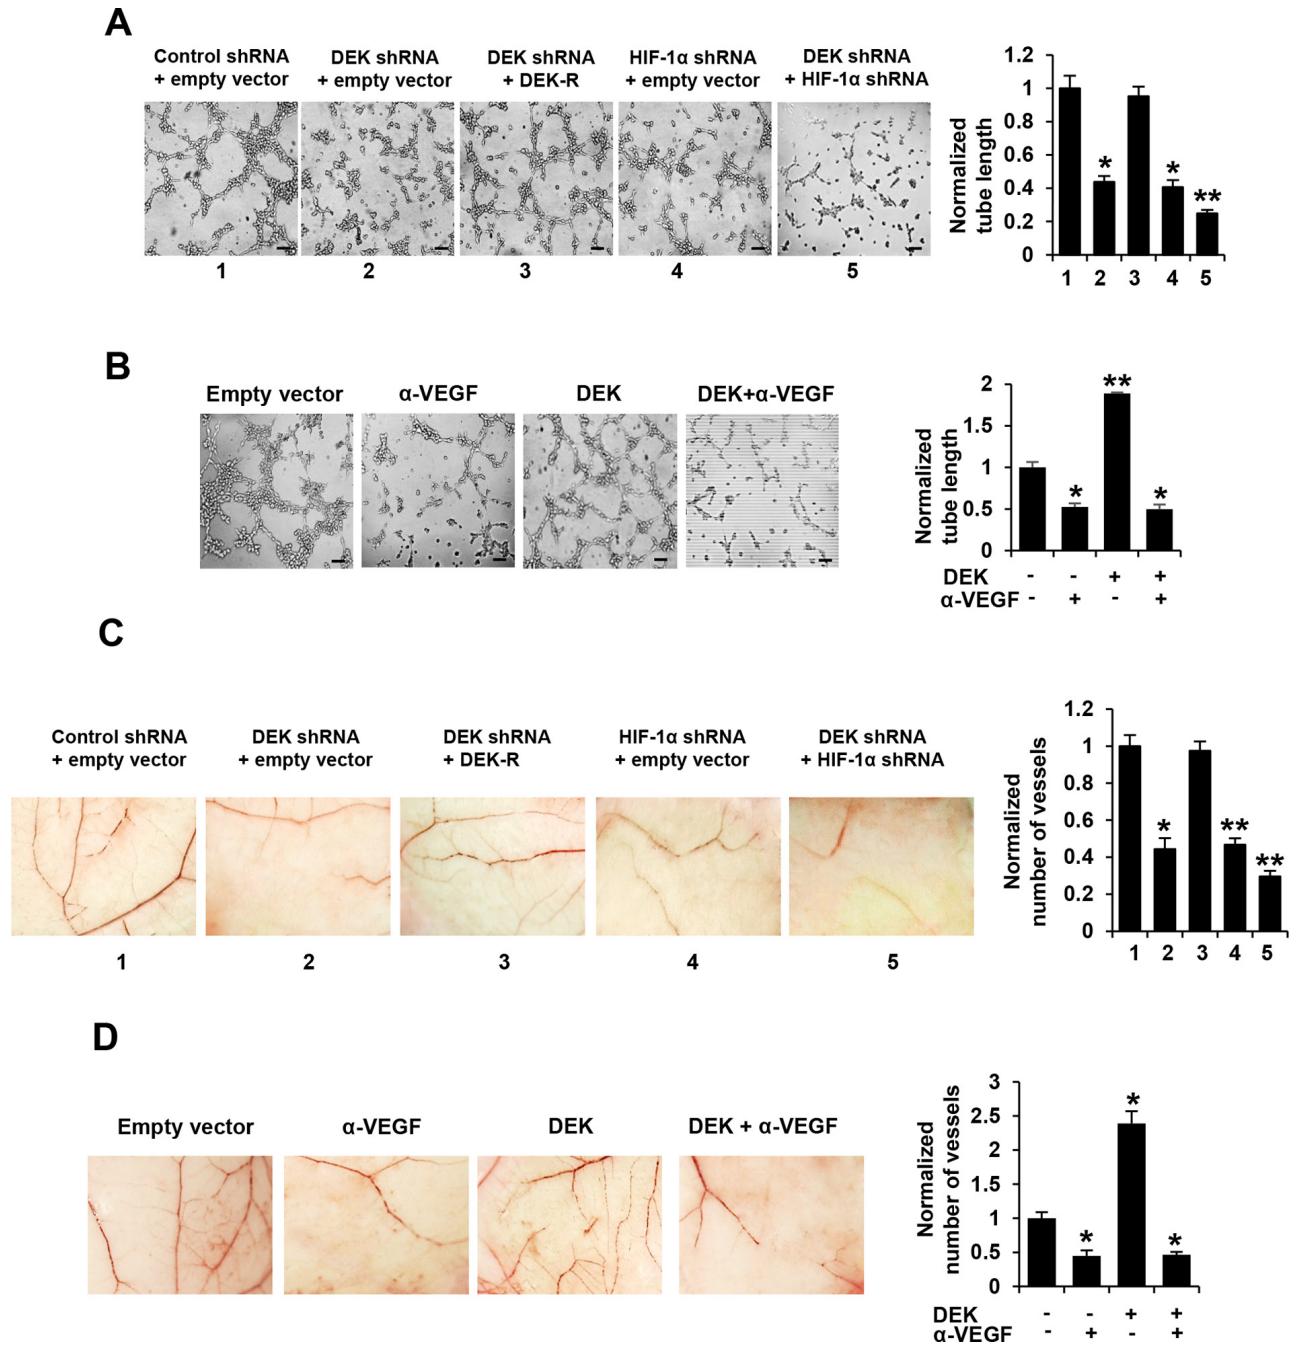

**Supplementary Figure S4: Cancer cell-secreted VEGF regulated by DEK controls HUVEC tube formation and angiogenesis.** **A.** Tube formation assays for HUVEC cells grown in the conditioned medium from MDA-MB-231 cells stably infected as in Supplementary Figure S3A. **B.** Tube formation assays for HUVEC cells grown in the conditioned medium from MDA-MB-231 cells stably transfected and treated as in Supplementary Figure S3B. **C.** CAM assays with conditioned medium from MDA-MB-231 cells stably infected as in Supplementary Figure S3A. **D.** CAM assays with conditioned medium from MDA-MB-231 cells stably transfected and treated as in Supplementary Figure S3B. The image displayed is one of the representative results (A-D). Scale bar: 100  $\mu$ m (A, B). All values shown are mean  $\pm$  SD of triplicate measurements and have been repeated 3 times with similar results (A-D). \* $P$  < 0.05, \*\* $P$  < 0.01 versus empty vector or control shRNA plus empty vector.

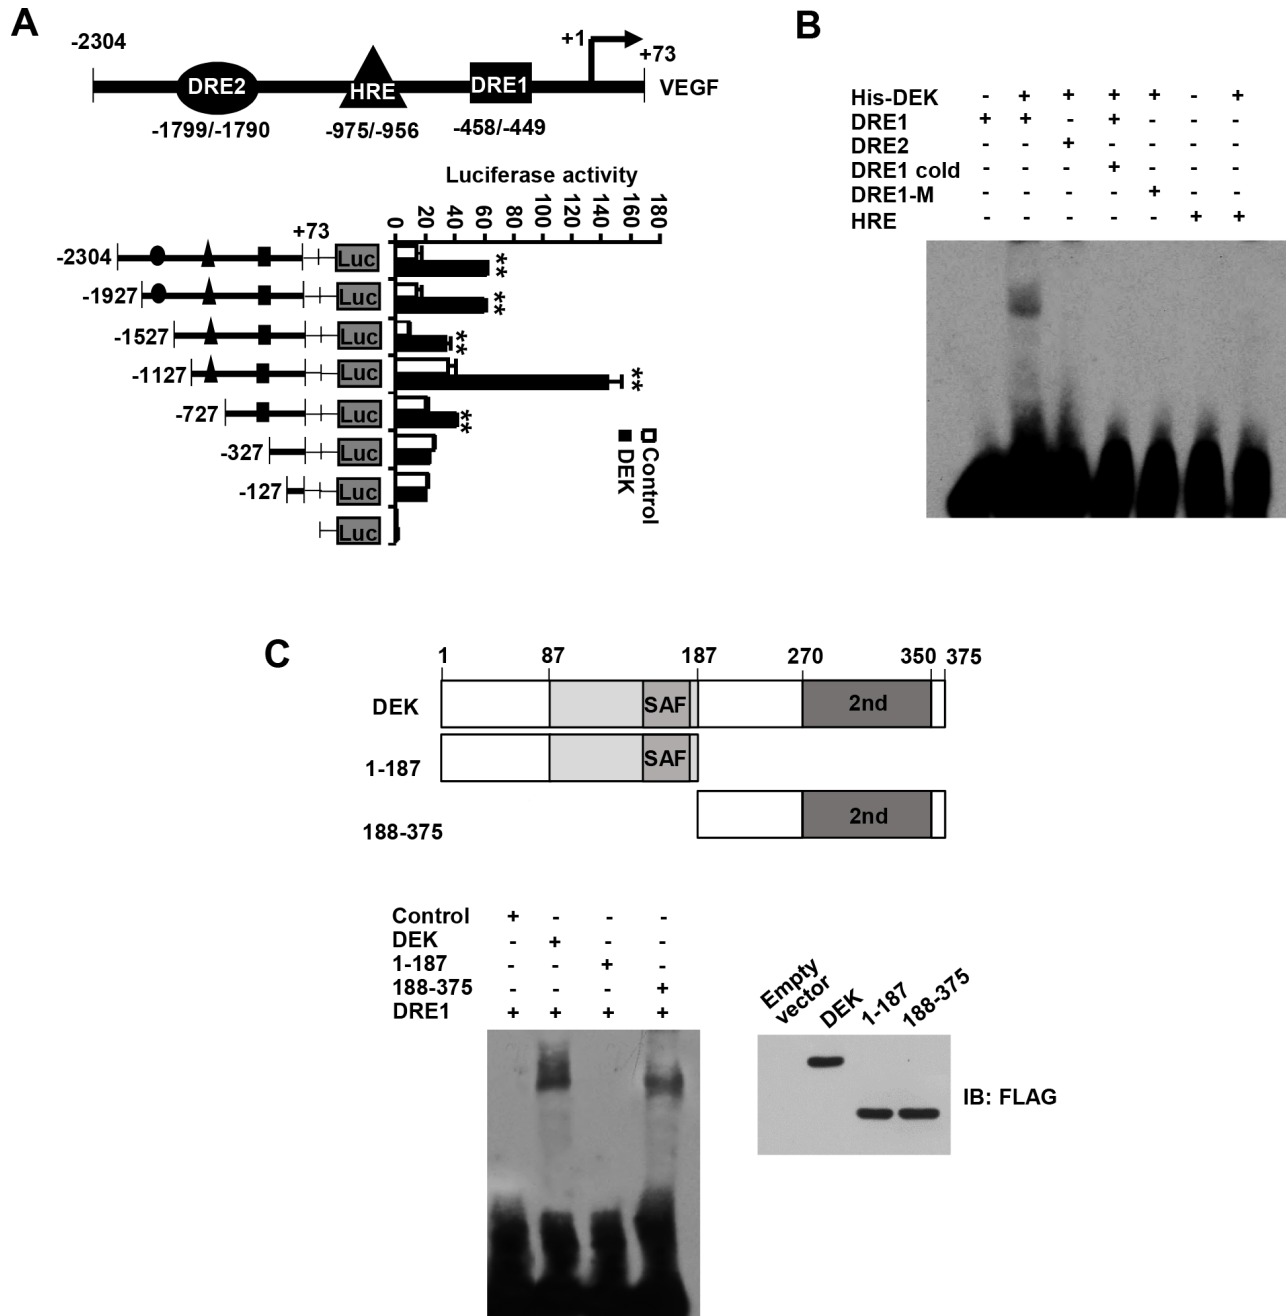

**Supplementary Figure S5: DEK regulates VEGF promoter reporter activity and directly binds to the DRE1 site of the VEGF promoter.** **A.** Luciferase activity of different VEGF promoter deletion constructs in MCF-7 cells transfected with DEK or empty vector (control). Data shown are mean  $\pm$  SD of triplicate measurements and have been repeated 3 times with similar results. **\*\*** $P < 0.01$  versus empty vector with corresponding promoter reporter construct. **B.** EMSA assay of DEK binding site in the VEGF promoter. Purified His-tagged DEK protein was incubated with biotin-labeled probes containing the DRE1, DRE2, or HRE site, or mutated DRE1 site (DRE1-M) of the VEGF promoter, as indicated. For competition experiments, a 100-fold molar excess of unlabeled DRE1 was mixed with the biotin-labeled probe. **C.** EMSA assay of the DEK domain that binds to the DRE1 site of the VEGF promoter. Nuclear extracts from DEK knockdown MCF-7 cells transfected with empty vector (control), FLAG-tagged DEK or FLAG-tagged DEK deletion mutants were incubated with biotin-labeled probes containing the DRE1 site, as indicated. Western blot shows the expression of DEK and its deletion mutants with anti-FLAG. Schematic diagram of DEK and its deletion mutants is shown. SAF, scaffold attachment factor; 2nd DBD, second DNA binding domain.



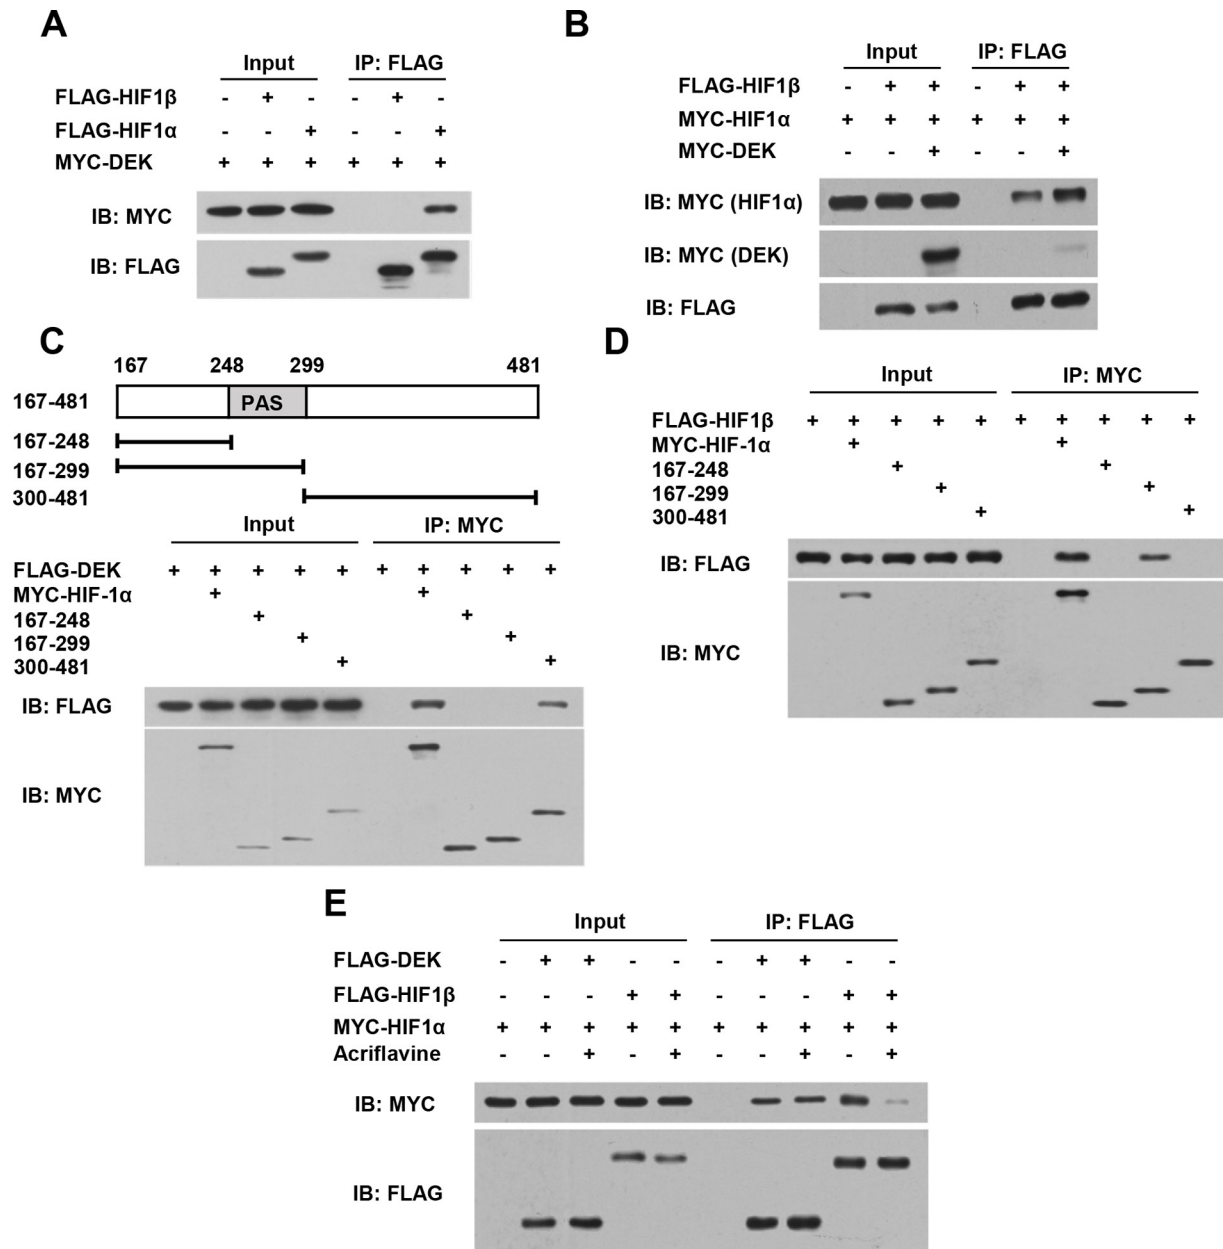

**Supplementary Figure S6: DEK enhanced the dimerization of HIF-1 $\alpha$  and HIF-1 $\beta$ .** **A.** Co-IP assays with HEK293T cells cotransfected with FLAG-tagged HIF-1 $\alpha$  or FLAG-tagged HIF-1 $\beta$  and MYC-tagged DEK. Cell lysates were immunoprecipitated (IP) with anti-FLAG, followed by immunoblotting (IB) with the indicated antibodies. **B.** Co-IP assays with HEK293T cells cotransfected with MYC-tagged HIF-1 $\alpha$  and FLAG-tagged HIF-1 $\beta$  with or without MYC-tagged DEK. Cell lysates were immunoprecipitated (IP) with anti-FLAG, followed by immunoblotting (IB) with the indicated antibodies. **C.** HEK293T cells were cotransfected with FLAG-tagged DEK and MYC-tagged HIF-1 $\alpha$  or its deletion mutants. Cell lysates were immunoprecipitated with anti-MYC, followed by immunoblotting with the indicated antibodies. Schematic diagram of HIF-1 $\alpha$  and its deletion mutants is shown. **D.** HEK293T cells were cotransfected with FLAG-tagged HIF-1 $\beta$  and MYC-tagged HIF-1 $\alpha$  or its deletion mutants. Cell lysates were immunoprecipitated with anti-MYC, followed by immunoblotting with the indicated antibodies. **E.** HEK293T cells were cotransfected with MYC-tagged HIF-1 $\alpha$  and FLAG-tagged HIF-1 $\beta$  or FLAG-tagged DEK. Cell lysates were preincubated or did not preincubate with 5  $\mu$ M acriflavine and immunoprecipitated with anti-FLAG, followed by immunoblotting with the indicated antibodies.

**A**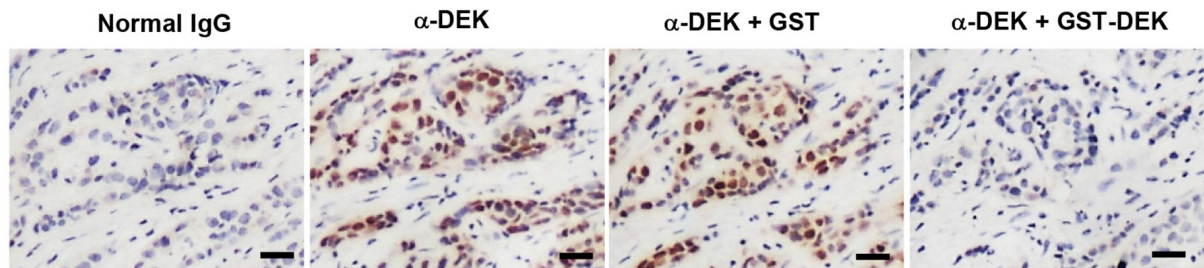**B**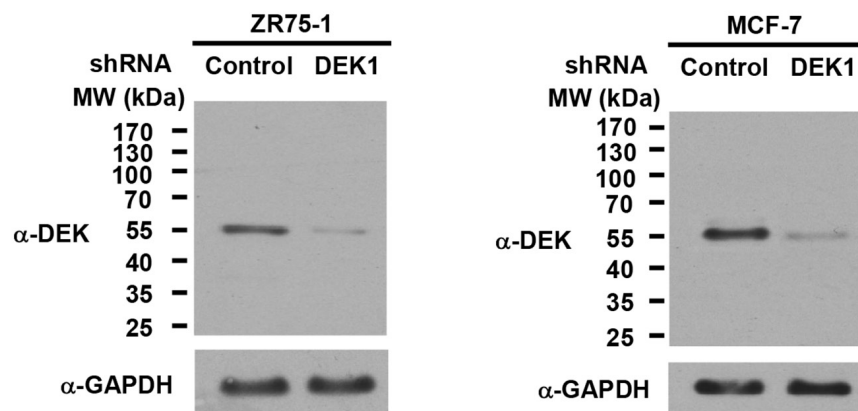

**Supplementary Figure S7: Validation of antibody specificity to DEK.** A. Representative immunohistochemical staining of breast cancer samples incubated with normal IgG or anti-DEK. To validate antibody specificity, the anti-DEK was pre-incubated with recombinant GST-DEK or GST for 1 h prior to applying to tissue. Scale bar, 25  $\mu$ m. B. Immunoblot analysis of cell lysates from ZR75-1 (left panel) or MCF-7 (right panel) cells infected with control shRNA or DEK shRNA with antibodies specific for anti-DEK.

## Supplementary Table S1: Sequences for shRNAs, RT-PCR, ChIP and EMSA

## Supplementary Table S1A: The cDNA target sequences of shRNAs

| Gene           | Target sequence (5'→3') |
|----------------|-------------------------|
| DEK1           | GGATAGTTCAGATGATGAACC   |
| DEK2           | TGTCCTCATTAAGAAGAAGA    |
| p300           | CAATGAGTCACAGTCCTTTGAT  |
| HIF-1 $\alpha$ | AGGACAGTCACAAACAGGA     |

## Supplementary Table S1B: Primers used for real-time RT-PCR

| Gene                | Forward (5'→3')        | Reverse (5'→3')         |
|---------------------|------------------------|-------------------------|
| DEK                 | AGGAGGAAGAGGACGAGGAC   | GGAAAGCCACTGAACTGACC    |
| VEGF <sub>121</sub> | ATAGAGCAAGACAAGAAAAATG | ATCGTTCTGTATCAGTCTTTCCT |
| VEGF <sub>165</sub> | AGAGCAAGACAAGAAAATCC   | TACAAACAAATGCTTTCTCC    |

## Supplementary Table S1C: Primers used for ChIP

| VEGF Promoter | Forward (5'→3')      | Reverse (5'→3')     |
|---------------|----------------------|---------------------|
| HRE           | CCTCTGTCTGCCAGCTGCC  | GTGGAGGTGCTAGGTTACC |
| DRE1          | GTCTCTGGACAGAGTTTCC  | CCTCAGCCCTTCCACACG  |
| DRE2          | CTAACTGTACAAAGACCTTG | GTGGAGGTGCTAGGTTACC |

## Supplementary Table S1D: Sequences of the oligonucleotides used for EMSA

| Probe  | Forward (5'→3')                             | Reverse (5'→3')                             |
|--------|---------------------------------------------|---------------------------------------------|
| HRE    | ACAGTGCATACGTGGGCTCCAACAG<br>GTCCTCTTCCCTCC | GGGAGGGAAGAGGACCTGTTGG<br>AGCCACGTATGCACTGT |
| DRE1   | GGGTTGAGGGCGTTGGAGCGGG<br>AGAAGGCCAGGGGT    | ACCCCTGGCCTTCTCCCCGCT<br>CCAACGCCCTCAACCC   |
| DRE1-M | GGGTTGAGGGCGGGTTCTATT<br>TGAGAAGGCCAGGGGT   | ACCCCTGGCCTTCTCAAAT<br>AGAACCCGCC TCAACCC   |
| DRE2   | TGGAAAGGGAGGGTTGGGGTG<br>GGTGGGAGCCAGCCCT   | AGGGCTGGCTCCCACCCA<br>CCCCAACCCCTCCCTTTCCA  |



**Supplementary Table S2: The raw data of tube formation and CAM in Figure 4****Supplementary Table S2A: The raw data in Figure 4A**

| Experiment | Tube length (pixels) |        |        |        |        |
|------------|----------------------|--------|--------|--------|--------|
|            | 1                    | 2      | 3      | 4      | 5      |
| 1st        | 628.62               | 315.93 | 584.32 | 283.43 | 142.66 |
|            | 674.21               | 274.24 | 618.19 | 253.72 | 188.52 |
| 2nd        | 699.46               | 338.89 | 690.07 | 317.21 | 159.69 |
|            | 745.71               | 307.10 | 660.44 | 284.70 | 210.99 |
| 3rd        | 657.85               | 300.27 | 582.47 | 267.25 | 140.79 |
|            | 588.08               | 271.61 | 621.10 | 233.61 | 160.10 |

**Supplementary Table S2B: The raw data in Figure 4B**

| Experiment | Tube length (pixels) |        |        |        |
|------------|----------------------|--------|--------|--------|
|            | 1                    | 2      | 3      | 4      |
| 1st        | 744.80               | 408.64 | 1458.3 | 326.20 |
|            | 677.28               | 365.01 | 1596.2 | 380.21 |
| 2nd        | 656.79               | 387.79 | 1349.0 | 332.49 |
|            | 708.68               | 349.56 | 1549.1 | 360.48 |
| 3rd        | 638.44               | 329.19 | 1258.1 | 322.33 |
|            | 608.51               | 351.64 | 1474.5 | 344.16 |

**Supplementary Table S2C: The raw data in Figure 4C**

| Experiment | Number of vessels |   |    |   |   |
|------------|-------------------|---|----|---|---|
|            | 1                 | 2 | 3  | 4 | 5 |
| 1st        | 10                | 5 | 10 | 4 | 2 |
|            | 11                | 4 | 11 | 5 | 3 |
| 2nd        | 11                | 5 | 12 | 6 | 3 |
|            | 13                | 6 | 10 | 6 | 4 |
| 3rd        | 12                | 6 | 11 | 5 | 3 |
|            | 11                | 5 | 11 | 7 | 3 |

**Supplementary Table S2D: The raw data in Figure 4D**

| Experiment | Number of vessels |   |    |   |
|------------|-------------------|---|----|---|
|            | 1                 | 2 | 3  | 4 |
| 1st        | 11                | 5 | 24 | 6 |
|            | 12                | 6 | 26 | 5 |
| 2nd        | 10                | 4 | 20 | 5 |
|            | 10                | 5 | 23 | 5 |
| 3rd        | 9                 | 5 | 21 | 5 |
|            | 11                | 4 | 23 | 4 |
